# Supplementary material
Source: Springer Nature journal article supplement (https://www.springermedizin.de/resource/supplementary/12962_2009_106_MOESM1_ESM.pdf/9572210)
Supplement: MOESM1 [file 9572210]

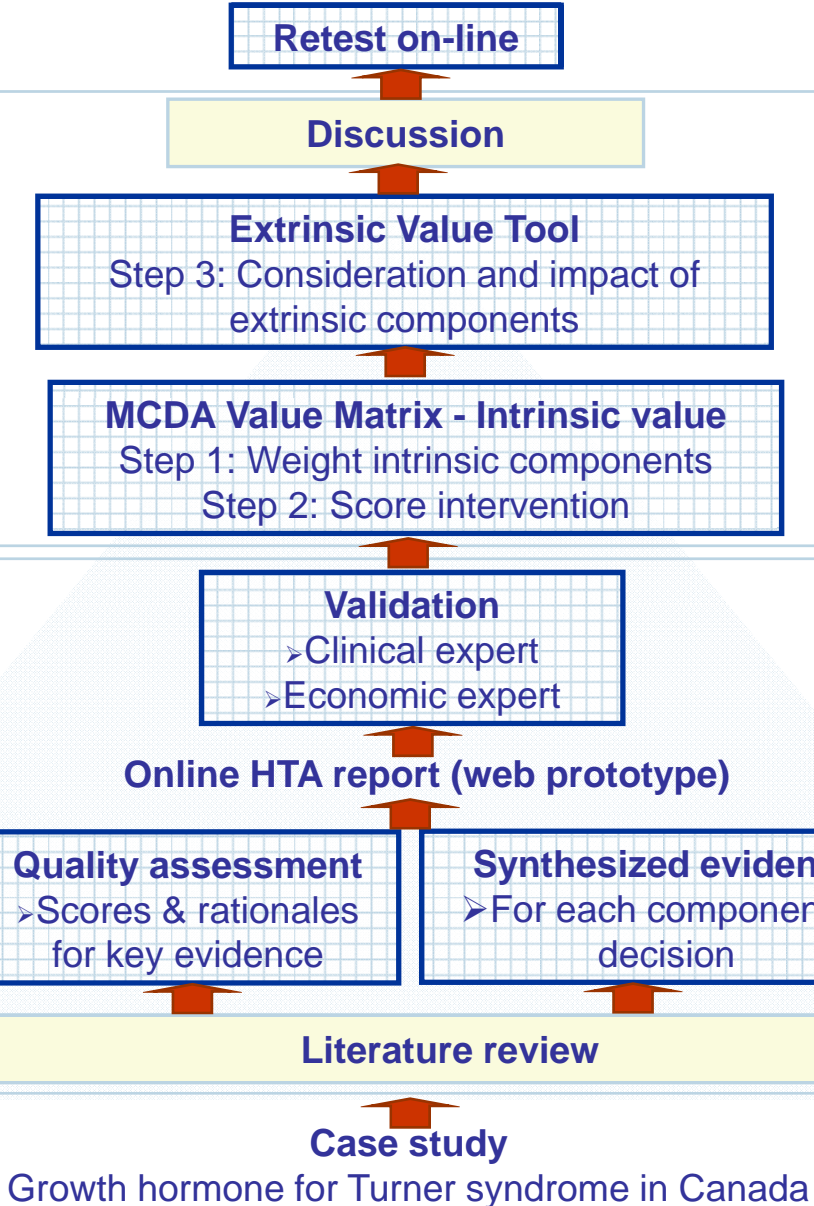

**Retest on-line**

**Value  
Assessment**

**Discussion**

**Panel**

**Extrinsic Value Tool**

Step 3: Consideration and impact of  
extrinsic components

**MCDA Value Matrix - Intrinsic value**

Step 1: Weight intrinsic components  
Step 2: Score intervention

**Validation**

- Clinical expert
- Economic expert

**Focused  
HTA report**

**Online HTA report (web prototype)**

**Investigators**

**Quality assessment**

- Scores & rationales  
for key evidence

**Synthesized evidence**

- For each component of  
decision

**Literature review**

**Case study**

Growth hormone for Turner syndrome in Canada
